# Supplementary material for: Lutein Esterification in Wheat Flour Increases the Carotenoid Retention and Is Induced by Storage Temperatures
Source: MDPI journal article supplement (doi:10.3390/foods6120111), 2017-12-11
Supplement: s1 [file s1]

**Table S1.** Evolution of the carotenoid composition ( $\mu\text{g/g}$  dry weight)<sup>1</sup> during long-term storage (12 months) of durum wheat (Don Pedro variety) whole-grain flours.

| Carotenoid                  | T<br>(°C) | Time (months)                          |             |             |             |             |             |             |             |             |             |             |             |             |
|-----------------------------|-----------|----------------------------------------|-------------|-------------|-------------|-------------|-------------|-------------|-------------|-------------|-------------|-------------|-------------|-------------|
|                             |           | Initial content<br>( $\mu\text{g/g}$ ) | 1           | 2           | 3           | 4           | 5           | 6           | 7           | 8           | 9           | 10          | 11          | 12          |
| (All- <i>E</i> )-Zeaxanthin | -32       | 0.08 ± 0.00                            | 0.08 ± 0.00 | 0.07 ± 0.00 | 0.08 ± 0.00 | 0.08 ± 0.00 | 0.07 ± 0.00 | 0.07 ± 0.00 | 0.08 ± 0.00 | 0.08 ± 0.00 | 0.08 ± 0.00 | 0.08 ± 0.00 | 0.08 ± 0.00 | 0.08 ± 0.00 |
|                             |           | a                                      | ab          | ab          | a           | a           | ab          | ab          | b           | b           | b           | ab          | ab          | b           |
|                             | 6         |                                        | 0.08 ± 0.00 | 0.08 ± 0.00 | 0.07 ± 0.00 | 0.07 ± 0.00 | 0.07 ± 0.00 | 0.07 ± 0.00 | 0.07 ± 0.00 | 0.07 ± 0.00 | 0.07 ± 0.00 | 0.07 ± 0.00 | 0.07 ± 0.00 | 0.07 ± 0.00 |
|                             |           | a                                      | abc         | d           | bc          | abc         | ab          | abc         | d           | abc         | c           | bc          | a           | a           |
|                             | 20        |                                        | 0.07 ± 0.00 | 0.07 ± 0.00 | 0.07 ± 0.01 | 0.06 ± 0.00 | 0.06 ± 0.00 | 0.05 ± 0.00 | 0.05 ± 0.00 | 0.04 ± 0.00 | 0.04 ± 0.00 | 0.04 ± 0.00 | 0.03 ± 0.00 | 0.03 ± 0.00 |
|                             |           | ab                                     | c           | a           | b           | d           | d           | e           | d           | e           | e           | e           | f           | f           |
| (all- <i>E</i> )-Lutein     | 37        |                                        | 0.06 ± 0.00 | 0.03 ± 0.00 | 0.03 ± 0.00 | 0.02 ± 0.00 | 0.02 ± 0.00 | 0.01 ± 0.00 | 0.01 ± 0.00 | 0.01 ± 0.00 | 0.01 ± 0.00 | 0.01 ± 0.00 | 0.00 ± 0.00 | 0.00 ± 0.00 |
|                             |           | a                                      | b           | c           | d           | e           | f           | e           | e           | g           | g           | g           | h           | h           |
|                             | 50        |                                        | 0.02 ± 0.00 | 0.01 ± 0.00 | 0.01 ± 0.00 | 0.00 ± 0.00 | 0.00 ± 0.00 | 0.00 ± 0.00 | 0.00 ± 0.00 | 0.00 ± 0.00 | 0.00 ± 0.00 | -           | -           | -           |
|                             |           | a                                      | b           | c           | cd          | de          | f           | ef          | f           | f           | f           | -           | -           | -           |
|                             | -32       | 1.08 ± 0.02                            | 1.06 ± 0.01 | 1.04 ± 0.02 | 1.05 ± 0.02 | 1.05 ± 0.01 | 1.06 ± 0.02 | 1.05 ± 0.01 | 1.09 ± 0.03 | 1.09 ± 0.04 | 1.05 ± 0.02 | 1.07 ± 0.00 | 1.07 ± 0.00 | 1.08 ± 0.02 |
|                             |           | abcd                                   | ae          | abe         | abce        | e           | abcd        | bcd         | f           | f           | bcd         | cd          | df          | df          |
| Total (Z)-Lutein            | 6         |                                        | 0.98 ± 0.01 | 1.02 ± 0.01 | 1.03 ± 0.00 | 1.03 ± 0.01 | 1.04 ± 0.05 | 1.04 ± 0.01 | 1.04 ± 0.02 | 1.04 ± 0.01 | 0.98 ± 0.01 | 1.03 ± 0.02 | 1.00 ± 0.01 | 0.98 ± 0.01 |
|                             |           | abc                                    | a           | def         | abc         | abc         | de          | bcd         | d           | ef          | bcd         | bcd         | abc         | ac          |
|                             | 20        |                                        | 0.99 ± 0.00 | 0.95 ± 0.01 | 0.92 ± 0.02 | 0.86 ± 0.01 | 0.85 ± 0.01 | 0.79 ± 0.00 | 0.79 ± 0.00 | 0.73 ± 0.01 | 0.71 ± 0.01 | 0.67 ± 0.00 | 0.56 ± 0.01 | 0.53 ± 0.00 |
|                             |           | a                                      | b           | a           | c           | d           | d           | e           | d           | e           | e           | f           | g           | g           |
|                             | 37        |                                        | 0.77 ± 0.01 | 0.60 ± 0.01 | 0.47 ± 0.01 | 0.32 ± 0.00 | 0.32 ± 0.01 | 0.27 ± 0.01 | 0.23 ± 0.01 | 0.17 ± 0.00 | 0.15 ± 0.00 | 0.16 ± 0.00 | 0.10 ± 0.00 | 0.10 ± 0.00 |
|                             |           | a                                      | b           | c           | d           | e           | f           | g           | h           | i           | i           | i           | j           | j           |
| Lutein monolinoleate        | 50        |                                        | 0.30 ± 0.00 | 0.17 ± 0.00 | 0.16 ± 0.00 | 0.13 ± 0.00 | 0.07 ± 0.00 | 0.09 ± 0.00 | 0.06 ± 0.00 | 0.07 ± 0.00 | 0.03 ± 0.00 | -           | -           | -           |
|                             |           | a                                      | b           | c           | cd          | d           | e           | e           | ef          | e           | f           | -           | -           | -           |
|                             | -32       | 0.18 ± 0.00                            | 0.17 ± 0.00 | 0.17 ± 0.00 | 0.16 ± 0.00 | 0.16 ± 0.00 | 0.16 ± 0.00 | 0.17 ± 0.00 | 0.17 ± 0.00 | 0.18 ± 0.00 | 0.17 ± 0.00 | 0.17 ± 0.00 | 0.17 ± 0.00 | 0.16 ± 0.00 |
|                             |           | abc                                    | d           | ab          | ad          | abc         | ab          | bc          | e           | f           | ab          | f           | c           | abc         |
|                             | 6         |                                        | 0.16 ± 0.00 | 0.15 ± 0.00 | 0.17 ± 0.00 | 0.16 ± 0.00 | 0.15 ± 0.01 | 0.16 ± 0.00 | 0.16 ± 0.01 | 0.17 ± 0.00 | 0.16 ± 0.00 | 0.17 ± 0.00 | 0.16 ± 0.00 | 0.16 ± 0.00 |
|                             |           | abc                                    | abcd        | d           | abc         | acd         | e           | abcd        | b           | ab          | cd          | abc         | abc         | abcd        |
|                             | 20        |                                        | 0.15 ± 0.00 | 0.15 ± 0.00 | 0.16 ± 0.00 | 0.14 ± 0.00 | 0.14 ± 0.00 | 0.13 ± 0.00 | 0.13 ± 0.00 | 0.12 ± 0.00 | 0.13 ± 0.00 | 0.11 ± 0.00 | 0.11 ± 0.00 | 0.11 ± 0.00 |
|                             |           | a                                      | b           | b           | b           | c           | b           | d           | c           | d           | d           | e           | e           | e           |
|                             | 37        |                                        | 0.16 ± 0.00 | 0.13 ± 0.00 | 0.09 ± 0.00 | 0.07 ± 0.00 | 0.07 ± 0.00 | 0.06 ± 0.00 | 0.05 ± 0.00 | 0.04 ± 0.00 | 0.03 ± 0.00 | 0.04 ± 0.00 | 0.03 ± 0.00 | 0.02 ± 0.00 |
|                             |           | a                                      | a           | b           | c           | d           | e           | d           | f           | g           | g           | g           | h           | h           |
|                             | 50        |                                        | 0.07 ± 0.00 | 0.05 ± 0.00 | 0.05 ± 0.00 | 0.04 ± 0.00 | 0.02 ± 0.00 | 0.03 ± 0.00 | 0.02 ± 0.00 | 0.02 ± 0.00 | 0.01 ± 0.00 | -           | -           | -           |
|                             |           | a                                      | b           | c           | d           | e           | f           | g           | f           | h           | i           | -           | -           | -           |

|                                |     |                    |                   |                    |                   |                   |                   |                    |                    |                    |                   |                   |                    |                    |
|--------------------------------|-----|--------------------|-------------------|--------------------|-------------------|-------------------|-------------------|--------------------|--------------------|--------------------|-------------------|-------------------|--------------------|--------------------|
| Lutein 3'- <i>O</i> -linoleate | 6   |                    | 0.03 ± 0.00<br>a  | 0.03 ± 0.00<br>b   | 0.04 ± 0.00<br>c  | 0.04 ± 0.00<br>c  | 0.05 ± 0.00<br>d  | 0.05 ± 0.00<br>e   | 0.06 ± 0.00<br>f   | 0.06 ± 0.00<br>g   | 0.06 ± 0.00<br>g  | 0.07 ± 0.00<br>hi | 0.07 ± 0.00<br>h   | 0.07 ± 0.00<br>i   |
|                                | 20  |                    | 0.04 ± 0.01<br>b  | 0.06 ± 0.01<br>c   | 0.08 ± 0.01<br>d  | 0.08 ± 0.00<br>d  | 0.09 ± 0.00<br>e  | 0.10 ± 0.00<br>f   | 0.11 ± 0.00<br>g   | 0.11 ± 0.00<br>g   | 0.11 ± 0.00<br>g  | 0.12 ± 0.00<br>g  | 0.10 ± 0.00<br>f   | 0.11 ± 0.00<br>h   |
|                                | 37  |                    | 0.09 ± 0.01<br>b  | 0.12 ± 0.01<br>c   | 0.12 ± 0.00<br>c  | 0.12 ± 0.01<br>bd | 0.11 ± 0.01<br>c  | 0.08 ± 0.01<br>d   | 0.07 ± 0.00<br>e   | 0.05 ± 0.01<br>f   | 0.04 ± 0.00<br>f  | 0.04 ± 0.00<br>f  | 0.03 ± 0.01<br>a   | 0.03 ± 0.00<br>a   |
|                                | 50  |                    | 0.10 ± 0.02<br>b  | 0.08 ± 0.01<br>c   | 0.06 ± 0.00<br>d  | 0.05 ± 0.01<br>e  | 0.03 ± 0.01<br>f  | 0.03 ± 0.00<br>g   | 0.02 ± 0.00<br>h   | 0.02 ± 0.00<br>a   | 0.01 ± 0.00<br>i  | -                 | -                  | -                  |
|                                | -32 | 0.01 ± 0.00<br>ab  | 0.01 ± 0.00<br>ab | 0.01 ± 0.00<br>ab  | 0.01 ± 0.00<br>ab | 0.01 ± 0.00<br>ab | 0.01 ± 0.00<br>ab | 0.01 ± 0.00<br>ab  | 0.01 ± 0.00<br>c   | 0.01 ± 0.00<br>ab  | 0.01 ± 0.00<br>a  | 0.01 ± 0.00<br>b  | 0.01 ± 0.00<br>ab  | 0.01 ± 0.00<br>ab  |
|                                | 6   | a                  | 0.01 ± 0.00<br>a  | 0.02 ± 0.00<br>b   | 0.02 ± 0.00<br>c  | 0.02 ± 0.00<br>c  | 0.02 ± 0.00<br>d  | 0.02 ± 0.00<br>e   | 0.03 ± 0.00<br>f   | 0.03 ± 0.00<br>g   | 0.03 ± 0.00<br>g  | 0.03 ± 0.00<br>h  | 0.03 ± 0.00<br>h   | 0.03 ± 0.00<br>h   |
|                                | 20  | a                  | 0.02 ± 0.00<br>b  | 0.03 ± 0.00<br>c   | 0.04 ± 0.00<br>d  | 0.04 ± 0.00<br>d  | 0.05 ± 0.00<br>e  | 0.06 ± 0.00<br>f   | 0.06 ± 0.00<br>g   | 0.06 ± 0.00<br>gh  | 0.06 ± 0.00<br>gi | 0.06 ± 0.00<br>h  | 0.06 ± 0.00<br>i   | 0.06 ± 0.00<br>gh  |
|                                | 37  | a                  | 0.05 ± 0.00<br>b  | 0.06 ± 0.00<br>c   | 0.06 ± 0.00<br>c  | 0.06 ± 0.00<br>b  | 0.06 ± 0.00<br>c  | 0.05 ± 0.00<br>b   | 0.04 ± 0.00<br>d   | 0.03 ± 0.00<br>e   | 0.03 ± 0.00<br>e  | 0.03 ± 0.00<br>e  | 0.02 ± 0.00<br>f   | 0.02 ± 0.00<br>af  |
|                                | 50  | a                  | 0.06 ± 0.00<br>b  | 0.04 ± 0.00<br>c   | 0.03 ± 0.00<br>d  | 0.02 ± 0.00<br>e  | 0.01 ± 0.00<br>a  | 0.02 ± 0.00<br>f   | 0.01 ± 0.00<br>a   | 0.01 ± 0.00<br>a   | 0.01 ± 0.00<br>g  | -                 | -                  | -                  |
|                                | -32 | 0.01 ± 0.00<br>ab  | 0.01 ± 0.00<br>ab | 0.01 ± 0.00<br>a   | 0.01 ± 0.00<br>ab | 0.01 ± 0.00<br>a  | 0.01 ± 0.00<br>ab | 0.01 ± 0.00<br>ab  | 0.02 ± 0.00<br>c   | 0.01 ± 0.00<br>ab  | 0.01 ± 0.00<br>ab | 0.02 ± 0.00<br>bc | 0.01 ± 0.00<br>ab  | 0.01 ± 0.00<br>ab  |
|                                | 6   | a                  | 0.01 ± 0.00<br>a  | 0.02 ± 0.00<br>b   | 0.02 ± 0.00<br>c  | 0.02 ± 0.00<br>c  | 0.02 ± 0.00<br>d  | 0.03 ± 0.00<br>e   | 0.03 ± 0.00<br>f   | 0.03 ± 0.00<br>g   | 0.03 ± 0.00<br>gh | 0.04 ± 0.00<br>ij | 0.04 ± 0.00<br>hi  | 0.04 ± 0.00<br>j   |
| Lutein 3'- <i>O</i> -linoleate | 20  | a                  | 0.02 ± 0.00<br>b  | 0.03 ± 0.00<br>c   | 0.04 ± 0.00<br>d  | 0.04 ± 0.00<br>e  | 0.05 ± 0.00<br>fg | 0.05 ± 0.00<br>f   | 0.05 ± 0.00<br>h   | 0.05 ± 0.00<br>i   | 0.05 ± 0.00<br>hi | 0.05 ± 0.00<br>i  | 0.04 ± 0.00<br>g   | 0.05 ± 0.00<br>fg  |
|                                | 37  | ab                 | 0.05 ± 0.00<br>c  | 0.06 ± 0.00<br>d   | 0.05 ± 0.00<br>e  | 0.05 ± 0.00<br>f  | 0.05 ± 0.00<br>e  | 0.03 ± 0.00<br>fg  | 0.03 ± 0.00<br>g   | 0.02 ± 0.00<br>h   | 0.02 ± 0.00<br>hi | 0.02 ± 0.00<br>ai | 0.01 ± 0.00<br>j   | 0.01 ± 0.00<br>bj  |
|                                | 50  | a                  | 0.04 ± 0.00<br>b  | 0.04 ± 0.00<br>c   | 0.03 ± 0.00<br>c  | 0.03 ± 0.00<br>d  | 0.02 ± 0.00<br>e  | 0.02 ± 0.00<br>f   | 0.01 ± 0.00<br>e   | 0.01 ± 0.00<br>a   | 0.00 ± 0.00<br>g  | -                 | -                  | -                  |
|                                | -32 | 0.01 ± 0.00<br>abc | 0.01 ± 0.00<br>a  | 0.01 ± 0.00<br>abc | 0.01 ± 0.00<br>d  | 0.00 ± 0.00<br>d  | 0.01 ± 0.00<br>d  | 0.01 ± 0.00<br>abc | 0.01 ± 0.00<br>bc  | 0.01 ± 0.00<br>b   | 0.01 ± 0.00<br>ac | 0.01 ± 0.00<br>b  | 0.01 ± 0.00<br>abc | 0.01 ± 0.00<br>abc |
|                                | 6   | a                  | 0.02 ± 0.00<br>b  | 0.02 ± 0.00<br>c   | 0.03 ± 0.00<br>c  | 0.02 ± 0.00<br>d  | 0.03 ± 0.00<br>c  | 0.03 ± 0.00<br>e   | 0.03 ± 0.00<br>ef  | 0.04 ± 0.00<br>g   | 0.03 ± 0.00<br>f  | 0.03 ± 0.00<br>f  | 0.03 ± 0.00<br>f   | 0.03 ± 0.00<br>f   |
|                                | 20  | a                  | 0.03 ± 0.00<br>b  | 0.04 ± 0.00<br>c   | 0.05 ± 0.00<br>d  | 0.04 ± 0.00<br>d  | 0.05 ± 0.00<br>e  | 0.06 ± 0.00<br>f   | 0.07 ± 0.00<br>g   | 0.06 ± 0.00<br>gh  | 0.06 ± 0.00<br>gh | 0.06 ± 0.00<br>h  | 0.06 ± 0.00<br>ef  | 0.06 ± 0.00<br>ef  |
|                                | 37  | a                  | 0.06 ± 0.00<br>b  | 0.08 ± 0.00<br>c   | 0.07 ± 0.00<br>d  | 0.07 ± 0.00<br>e  | 0.07 ± 0.00<br>d  | 0.05 ± 0.00<br>e   | 0.04 ± 0.00<br>e   | 0.03 ± 0.00<br>f   | 0.03 ± 0.00<br>f  | 0.03 ± 0.00<br>f  | 0.02 ± 0.00<br>g   | 0.02 ± 0.00<br>g   |
|                                | 50  | a                  | 0.07 ± 0.00<br>b  | 0.05 ± 0.00<br>c   | 0.04 ± 0.00<br>d  | 0.02 ± 0.00<br>e  | 0.01 ± 0.00<br>fg | 0.01 ± 0.00<br>h   | 0.01 ± 0.00<br>af  | 0.01 ± 0.00<br>g   | 0.00 ± 0.00<br>i  | -                 | -                  | -                  |
|                                | -32 | 0.00 ± 0.00<br>abc | 0.00 ± 0.00<br>ab | 0.00 ± 0.00<br>abc | 0.00 ± 0.00<br>d  | 0.00 ± 0.00<br>d  | 0.00 ± 0.00<br>d  | 0.00 ± 0.00<br>abc | 0.00 ± 0.00<br>abc | 0.00 ± 0.00<br>abc | 0.00 ± 0.00<br>a  | 0.00 ± 0.00<br>bc | 0.00 ± 0.00<br>c   | 0.00 ± 0.00<br>abc |
|                                | 6   | a                  | 0.00 ± 0.00       | 0.01 ± 0.00        | 0.01 ± 0.00       | 0.01 ± 0.00       | 0.01 ± 0.00       | 0.01 ± 0.00        | 0.01 ± 0.00        | 0.01 ± 0.00        | 0.01 ± 0.00       | 0.01 ± 0.00       | 0.01 ± 0.00        | 0.01 ± 0.00        |
| Lutein 3'- <i>O</i> -palmitate | -32 | 0.00 ± 0.00<br>abc | 0.00 ± 0.00<br>ab | 0.00 ± 0.00<br>abc | 0.00 ± 0.00<br>d  | 0.00 ± 0.00<br>d  | 0.00 ± 0.00<br>d  | 0.00 ± 0.00<br>abc | 0.00 ± 0.00<br>abc | 0.00 ± 0.00<br>abc | 0.00 ± 0.00<br>a  | 0.00 ± 0.00<br>bc | 0.00 ± 0.00<br>c   | 0.00 ± 0.00<br>abc |
|                                | 6   | a                  | 0.00 ± 0.00       | 0.01 ± 0.00        | 0.01 ± 0.00       | 0.01 ± 0.00       | 0.01 ± 0.00       | 0.01 ± 0.00        | 0.01 ± 0.00        | 0.01 ± 0.00        | 0.01 ± 0.00       | 0.01 ± 0.00       | 0.01 ± 0.00        | 0.01 ± 0.00        |

|                               |            |                     |             |             |             |             |             |             |             |             |             |             |             |             |
|-------------------------------|------------|---------------------|-------------|-------------|-------------|-------------|-------------|-------------|-------------|-------------|-------------|-------------|-------------|-------------|
| Lutein 3- <i>O</i> -palmitate | <b>20</b>  | a                   | a           | b           | c           | bc          | d           | e           | e           | f           | f           | f           | f           | f           |
|                               |            |                     | 0.01 ± 0.00 | 0.02 ± 0.00 | 0.02 ± 0.00 | 0.02 ± 0.00 | 0.03 ± 0.00 | 0.03 ± 0.00 | 0.04 ± 0.00 | 0.04 ± 0.00 | 0.04 ± 0.00 | 0.04 ± 0.00 | 0.03 ± 0.00 | 0.03 ± 0.00 |
|                               | <b>37</b>  | a                   | b           | c           | d           | d           | e           | f           | g           | g           | g           | g           | f           | f           |
|                               |            |                     | 0.03 ± 0.00 | 0.04 ± 0.00 | 0.04 ± 0.00 | 0.04 ± 0.00 | 0.04 ± 0.00 | 0.03 ± 0.00 | 0.03 ± 0.00 | 0.02 ± 0.00 | 0.02 ± 0.00 | 0.02 ± 0.00 | 0.01 ± 0.00 | 0.01 ± 0.00 |
|                               | <b>50</b>  | a                   | b           | c           | c           | bd          | c           | bd          | d           | e           | e           | e           | f           | f           |
|                               |            |                     | 0.04 ± 0.00 | 0.03 ± 0.00 | 0.02 ± 0.00 | 0.01 ± 0.00 | 0.01 ± 0.00 | 0.01 ± 0.00 | 0.00 ± 0.00 | 0.00 ± 0.00 | 0.00 ± 0.00 | 0.00 ± 0.00 | 0.00 ± 0.00 | 0.00 ± 0.00 |
|                               | <b>-32</b> | 0.00 ± 0.00<br>abcd | a           | b           | c           | d           | e           | e           | f           | f           | f           | f           | f           | f           |
|                               |            |                     | 0.00 ± 0.00 | 0.00 ± 0.00 | 0.00 ± 0.00 | 0.00 ± 0.00 | 0.00 ± 0.00 | 0.00 ± 0.00 | 0.00 ± 0.00 | 0.00 ± 0.00 | 0.00 ± 0.00 | 0.00 ± 0.00 | 0.00 ± 0.00 | 0.00 ± 0.00 |
|                               | <b>6</b>   | a                   | ae          | abc         | ae          | e           | e           | abcd        | bcd         | d           | abe         | cd          | abc         | abcd        |
|                               |            |                     | 0.02 ± 0.00 | 0.02 ± 0.00 | 0.02 ± 0.00 | 0.02 ± 0.00 | 0.02 ± 0.00 | 0.02 ± 0.00 | 0.02 ± 0.00 | 0.02 ± 0.00 | 0.02 ± 0.00 | 0.02 ± 0.00 | 0.02 ± 0.00 | 0.02 ± 0.00 |
|                               | <b>20</b>  | a                   | b           | c           | c           | b           | c           | d           | d           | e           | d           | d           | d           | d           |
|                               |            |                     | 0.02 ± 0.00 | 0.02 ± 0.00 | 0.02 ± 0.00 | 0.02 ± 0.00 | 0.03 ± 0.00 | 0.02 ± 0.00 | 0.03 ± 0.00 | 0.03 ± 0.00 | 0.03 ± 0.00 | 0.02 ± 0.00 | 0.02 ± 0.00 | 0.02 ± 0.00 |
|                               | <b>37</b>  | a                   | b           | cde         | cdf         | ce          | fgh         | fgh         | i           | gh          | g           | dfh         | cde         | e           |
|                               |            |                     | 0.03 ± 0.00 | 0.04 ± 0.00 | 0.03 ± 0.00 | 0.03 ± 0.00 | 0.03 ± 0.00 | 0.02 ± 0.00 | 0.02 ± 0.00 | 0.01 ± 0.00 | 0.01 ± 0.00 | 0.01 ± 0.00 | 0.01 ± 0.00 | 0.01 ± 0.00 |
|                               | <b>50</b>  | a                   | b           | c           | d           | e           | a           | f           | a           | g           | h           | -           | -           | -           |
|                               |            |                     | 0.03 ± 0.00 | 0.02 ± 0.00 | 0.02 ± 0.00 | 0.01 ± 0.00 | 0.01 ± 0.00 | 0.00 ± 0.00 | 0.00 ± 0.00 | 0.00 ± 0.00 | 0.00 ± 0.00 | -           | -           | -           |
| (all- <i>E</i> )-β-Carotene   | <b>-32</b> | 0.02 ± 0.00<br>ab   | a           | b           | c           | d           | e           | e           | f           | f           | f           | f           | f           | f           |
|                               |            |                     | 0.03 ± 0.00 | 0.03 ± 0.00 | 0.03 ± 0.00 | 0.02 ± 0.00 | 0.02 ± 0.00 | 0.03 ± 0.00 | 0.03 ± 0.00 | 0.03 ± 0.00 | 0.03 ± 0.00 | 0.03 ± 0.00 | 0.03 ± 0.00 | 0.02 ± 0.00 |
|                               | <b>6</b>   | a                   | cde         | abc         | ab          | abcd        | e           | f           | de          | abc         | e           | de          | bcde        | bcde        |
|                               |            |                     | 0.02 ± 0.00 | 0.02 ± 0.00 | 0.02 ± 0.00 | 0.02 ± 0.00 | 0.02 ± 0.00 | 0.02 ± 0.00 | 0.02 ± 0.00 | 0.02 ± 0.00 | 0.03 ± 0.00 | 0.02 ± 0.00 | 0.02 ± 0.00 | 0.02 ± 0.00 |
|                               | <b>20</b>  | ab                  | a           | bc          | bcde        | adf         | cde         | cdef        | bce         | b           | cde         | cdef        | adef        | af          |
|                               |            |                     | 0.02 ± 0.00 | 0.02 ± 0.00 | 0.02 ± 0.00 | 0.02 ± 0.00 | 0.02 ± 0.00 | 0.02 ± 0.00 | 0.02 ± 0.00 | 0.02 ± 0.00 | 0.02 ± 0.00 | 0.02 ± 0.00 | 0.01 ± 0.00 | 0.01 ± 0.00 |
|                               | <b>37</b>  | a                   | a           | ab          | bc          | cd          | cd          | de          | abc         | de          | e           | f           | g           | g           |
|                               |            |                     | 0.02 ± 0.00 | 0.02 ± 0.00 | 0.01 ± 0.00 | 0.01 ± 0.00 | 0.01 ± 0.00 | 0.01 ± 0.00 | 0.01 ± 0.00 | 0.00 ± 0.00 | 0.00 ± 0.00 | 0.00 ± 0.00 | 0.00 ± 0.00 | 0.00 ± 0.00 |
|                               | <b>50</b>  | a                   | b           | b           | c           | de          | c           | d           | e           | f           | f           | f           | g           | g           |
|                               |            |                     | 0.01 ± 0.00 | 0.01 ± 0.00 | 0.01 ± 0.00 | 0.00 ± 0.00 | 0.00 ± 0.00 | 0.00 ± 0.00 | 0.00 ± 0.00 | 0.00 ± 0.00 | 0.00 ± 0.00 | -           | -           | -           |
| Lutein dilinoleate            | <b>-32</b> | 0.00 ± 0.00<br>a    | a           | b           | c           | d           | e           | d           | g           | f           | f           | f           | -           | -           |
|                               |            |                     | -           | -           | -           | -           | -           | -           | -           | -           | -           | -           | -           | -           |
|                               | <b>6</b>   | a                   | a           | a           | a           | a           | a           | a           | a           | b           | c           | d           | a           | c           |
|                               |            |                     | 0.00 ± 0.00 | 0.00 ± 0.00 | 0.00 ± 0.00 | 0.00 ± 0.00 | 0.00 ± 0.00 | 0.00 ± 0.00 | 0.00 ± 0.00 | 0.01 ± 0.00 | 0.01 ± 0.00 | 0.01 ± 0.00 | 0.00 ± 0.00 | 0.01 ± 0.00 |
|                               | <b>20</b>  | a                   | a           | a           | a           | b           | b           | c           | d           | d           | d           | e           | f           | e           |
|                               |            |                     | 0.00 ± 0.00 | 0.00 ± 0.00 | 0.00 ± 0.00 | 0.01 ± 0.00 | 0.02 ± 0.00 | 0.03 ± 0.00 | 0.03 ± 0.00 | 0.03 ± 0.00 | 0.03 ± 0.00 | 0.05 ± 0.00 | 0.04 ± 0.00 | 0.05 ± 0.00 |
|                               | <b>37</b>  | a                   | a           | a           | a           | b           | b           | c           | d           | d           | d           | e           | f           | e           |
|                               |            |                     | 0.01 ± 0.00 | 0.03 ± 0.00 | 0.05 ± 0.00 | 0.06 ± 0.00 | 0.08 ± 0.01 | 0.07 ± 0.00 | 0.07 ± 0.00 | 0.06 ± 0.00 | 0.06 ± 0.00 | 0.05 ± 0.00 | 0.04 ± 0.00 | 0.03 ± 0.00 |
|                               | <b>50</b>  | a                   | b           | c           | d           | de          | f           | fg          | fg          | eg          | de          | de          | h           | h           |
|                               |            |                     | 0.06 ± 0.00 | 0.06 ± 0.00 | 0.05 ± 0.00 | 0.04 ± 0.00 | 0.03 ± 0.00 | 0.03 ± 0.00 | 0.02 ± 0.00 | 0.02 ± 0.00 | 0.00 ± 0.00 | -           | -           | -           |

|                                                                                                                 |     |                  |                  |                   |                    |                    |                  |                   |                    |                   |                    |                   |                    |                   |
|-----------------------------------------------------------------------------------------------------------------|-----|------------------|------------------|-------------------|--------------------|--------------------|------------------|-------------------|--------------------|-------------------|--------------------|-------------------|--------------------|-------------------|
| Lutein 3'- <i>O</i> -linoleate-3- <i>O</i> -palmitate and Lutein 3'- <i>O</i> -palmitate-3- <i>O</i> -linoleate | -32 | 0.00 ± 0.00<br>a | -                | -                 | -                  | -                  | -                | -                 | -                  | -                 | -                  | -                 | -                  | -                 |
|                                                                                                                 | 6   |                  | 0.00 ± 0.00<br>a | 0.00 ± 0.00<br>a  | 0.00 ± 0.00<br>a   | 0.00 ± 0.00<br>a   | 0.00 ± 0.00<br>a | 0.00 ± 0.00<br>a  | 0.00 ± 0.00<br>a   | 0.00 ± 0.00<br>b  | 0.00 ± 0.00<br>c   | 0.00 ± 0.00<br>d  | 0.00 ± 0.00<br>c   |                   |
|                                                                                                                 | 20  |                  | 0.00 ± 0.00<br>a | 0.00 ± 0.00<br>a  | 0.00 ± 0.00<br>a   | 0.01 ± 0.00<br>b   | 0.01 ± 0.00<br>b | 0.01 ± 0.00<br>c  | 0.02 ± 0.00<br>d   | 0.02 ± 0.00<br>d  | 0.02 ± 0.00<br>d   | 0.02 ± 0.00<br>e  | 0.02 ± 0.00<br>f   | 0.02 ± 0.00<br>e  |
|                                                                                                                 | 37  |                  | 0.01 ± 0.00<br>b | 0.02 ± 0.00<br>c  | 0.04 ± 0.00<br>d   | 0.04 ± 0.00<br>d   | 0.05 ± 0.00<br>e | 0.05 ± 0.00<br>f  | 0.05 ± 0.00<br>f   | 0.04 ± 0.00<br>d  | 0.03 ± 0.00<br>d   | 0.03 ± 0.00<br>d  | 0.02 ± 0.00<br>c   | 0.02 ± 0.00<br>c  |
|                                                                                                                 | 50  |                  | 0.05 ± 0.00<br>b | 0.05 ± 0.00<br>c  | 0.04 ± 0.00<br>c   | 0.03 ± 0.00<br>d   | 0.02 ± 0.00<br>e | 0.02 ± 0.00<br>f  | 0.01 ± 0.00<br>e   | 0.01 ± 0.00<br>e  | 0.00 ± 0.00<br>a   | -                 | -                  | -                 |
| Lutein dipalmitate                                                                                              | -32 | 0.00 ± 0.00<br>a | -                | -                 | -                  | -                  |                  | -                 | -                  | -                 | -                  | -                 | -                  | -                 |
|                                                                                                                 | 6   |                  | -                | -                 | -                  | -                  | -                | -                 | -                  | -                 | -                  | -                 | -                  | -                 |
|                                                                                                                 | 20  |                  | 0.00 ± 0.00<br>a | 0.00 ± 0.00<br>a  | 0.00 ± 0.00<br>a   | 0.00 ± 0.00<br>a   | 0.00 ± 0.00<br>a | 0.00 ± 0.00<br>a  | 0.00 ± 0.00<br>bc  | 0.00 ± 0.00<br>bc | 0.00 ± 0.00<br>b   | 0.00 ± 0.00<br>d  | 0.00 ± 0.00<br>cd  | 0.00 ± 0.00<br>bc |
|                                                                                                                 | 37  |                  | 0.00 ± 0.00<br>b | 0.00 ± 0.00<br>bc | 0.01 ± 0.00<br>def | 0.01 ± 0.00<br>dgh | 0.01 ± 0.00<br>i | 0.01 ± 0.00<br>gi | 0.01 ± 0.00<br>ghi | 0.01 ± 0.00<br>de | 0.01 ± 0.00<br>deh | 0.01 ± 0.00<br>dh | 0.01 ± 0.00<br>cef | 0.00 ± 0.00<br>cf |
|                                                                                                                 | 50  |                  | 0.01 ± 0.00<br>b | 0.01 ± 0.00<br>bc | 0.01 ± 0.00<br>c   | 0.01 ± 0.00<br>d   | 0.01 ± 0.00<br>e | 0.01 ± 0.00<br>f  | 0.00 ± 0.00<br>ef  | 0.00 ± 0.00<br>ef | 0.00 ± 0.00<br>a   | -                 | -                  | -                 |
| <b>Monoesters and Regioisomers ratios</b>                                                                       |     |                  |                  |                   |                    |                    |                  |                   |                    |                   |                    |                   |                    |                   |
| Lutein monopalmitate/<br>Lutein monolinoleate                                                                   | -32 | 0.29             | 0.27             | 0.29              | 0.22               | 0.18               | 0.20             | 0.29              | 0.29               | 0.31              | 0.26               | 0.27              | 0.27               | 0.28              |
|                                                                                                                 | 6   |                  | 0.69             | 0.73              | 0.65               | 0.65               | 0.57             | 0.60              | 0.56               | 0.57              | 0.51               | 0.47              | 0.48               | 0.46              |
|                                                                                                                 | 20  |                  | 0.61             | 0.65              | 0.59               | 0.55               | 0.58             | 0.55              | 0.58               | 0.56              | 0.56               | 0.53              | 0.53               | 0.51              |
|                                                                                                                 | 37  |                  | 0.67             | 0.67              | 0.63               | 0.59               | 0.62             | 0.61              | 0.61               | 0.59              | 0.60               | 0.63              | 0.65               | 0.62              |
|                                                                                                                 | 50  |                  | 0.67             | 0.60              | 0.62               | 0.46               | 0.37             | 0.42              | 0.34               | 0.39              | 0.00               | 0.00              | 0.00               | 0.00              |
| Lutein 3- <i>O</i> -linoleate /Lutein 3'- <i>O</i> -linoleate                                                   | -32 | 1.04             | 1.09             | 0.96              | 1.03               | 0.96               | 1.12             | 1.03              | 1.30               | 1.20              | 1.19               | 1.11              | 1.06               | 1.09              |

|                                                                      |            |      |      |      |      |      |      |      |      |      |      |      |      |      |
|----------------------------------------------------------------------|------------|------|------|------|------|------|------|------|------|------|------|------|------|------|
| Lutein 3- <i>O</i> -<br>palmitate /Lutein 3'-<br><i>O</i> -palmitate | <b>6</b>   |      | 1.09 | 1.10 | 1.11 | 1.15 | 1.20 | 1.23 | 1.19 | 1.11 | 1.12 | 1.08 | 1.06 | 1.08 |
|                                                                      | <b>20</b>  |      | 1.14 | 1.08 | 1.02 | 1.11 | 1.03 | 0.85 | 0.84 | 0.83 | 0.88 | 0.79 | 0.75 | 0.75 |
|                                                                      | <b>37</b>  |      | 1.00 | 0.97 | 0.87 | 0.79 | 0.75 | 0.73 | 0.74 | 0.68 | 0.66 | 0.59 | 0.50 | 0.68 |
|                                                                      | <b>50</b>  |      | 0.77 | 0.83 | 1.06 | 1.26 | 1.38 | 1.11 | 1.09 | 0.76 | 0.49 | 0.00 | 0.00 | 0.00 |
|                                                                      | <b>-32</b> | 1.25 | 1.24 | 1.22 | 1.93 | 1.95 | 1.65 | 1.20 | 1.33 | 1.39 | 1.30 | 1.29 | 1.10 | 1.25 |
|                                                                      | <b>6</b>   |      | 4.00 | 3.49 | 3.07 | 3.11 | 2.47 | 2.30 | 2.25 | 2.03 | 1.84 | 1.76 | 1.78 | 1.77 |
|                                                                      | <b>20</b>  |      | 2.40 | 1.40 | 1.05 | 0.93 | 0.90 | 0.76 | 0.76 | 0.69 | 0.71 | 0.65 | 0.67 | 0.61 |
|                                                                      | <b>37</b>  |      | 0.90 | 0.78 | 0.71 | 0.62 | 0.61 | 0.61 | 0.63 | 0.60 | 0.61 | 0.65 | 0.62 | 0.54 |
|                                                                      | <b>50</b>  |      | 0.62 | 0.68 | 0.78 | 1.21 | 1.05 | 0.52 | 0.67 | 0.70 | 0.00 | 0.00 | 0.00 | 0.00 |

<sup>1</sup>Data are the mean  $\pm$  standard error (n=5 for the starting sample, n=3 for the rest of the samples). Different letters within the same line (for each pigment) indicate significant differences (p<0.05) determined by the Duncan test.
