# Supplementary material for: Lutein Esterification in Wheat Flour Increases the Carotenoid Retention and Is Induced by Storage Temperatures
Source: MDPI journal article supplement (doi:10.3390/foods6120111), 2017-12-11
Supplement: s1 [file s1]

**Table S2.** Evolution of the carotenoid composition ( $\mu\text{g/g}$  dry weight)<sup>1</sup> during long-term storage (12 months) of tritordeum (HT621 advanced line) whole-grain flours.

| Carotenoid                     | T<br>(°C) | Time (months)      |                  |                     |                    |                   |                   |                     |                   |                   |                     |                   |                    |                    |
|--------------------------------|-----------|--------------------|------------------|---------------------|--------------------|-------------------|-------------------|---------------------|-------------------|-------------------|---------------------|-------------------|--------------------|--------------------|
|                                |           | 0                  | 1                | 2                   | 3                  | 4                 | 5                 | 6                   | 7                 | 8                 | 9                   | 10                | 11                 | 12                 |
| (all- <i>E</i> )-Lutein        | -32       | 3.95 ± 0.04<br>ab  | 3.73 ± 0.02<br>a | 3.79 ± 0.01<br>cd   | 3.79 ± 0.01<br>bc  | 3.84 ± 0.04<br>e  | 3.82 ± 0.05<br>df | 3.77 ± 0.03<br>d    | 3.73 ± 0.01<br>g  | 3.79 ± 0.02<br>df | 3.76 ± 0.01<br>cd   | 3.88 ± 0.01<br>f  | 3.78 ± 0.01<br>d   | 3.69 ± 0.02<br>df  |
|                                | 6         | ab                 | 3.55 ± 0.02<br>a | 3.65 ± 0.01<br>c    | 3.65 ± 0.03<br>b   | 3.62 ± 0.01<br>ab | 3.54 ± 0.02<br>a  | 3.47 ± 0.02<br>d    | 3.57 ± 0.02<br>c  | 3.54 ± 0.01<br>ab | 3.42 ± 0.02<br>de   | 3.45 ± 0.02<br>d  | 3.36 ± 0.02<br>e   | 3.13 ± 0.01<br>f   |
|                                | 20        | a                  | 3.42 ± 0.02<br>b | 3.22 ± 0.02<br>c    | 2.98 ± 0.02<br>d   | 2.70 ± 0.01<br>e  | 2.49 ± 0.02<br>f  | 2.21 ± 0.05<br>g    | 2.13 ± 0.00<br>h  | 1.86 ± 0.01<br>i  | 1.71 ± 0.01<br>i    | 1.68 ± 0.01<br>i  | 1.52 ± 0.01<br>k   | 1.51 ± 0.01<br>k   |
|                                | 37        | a                  | 2.11 ± 0.02<br>b | 1.40 ± 0.01<br>c    | 0.93 ± 0.01<br>d   | 0.67 ± 0.02<br>e  | 0.48 ± 0.02<br>f  | 0.36 ± 0.01<br>g    | 0.26 ± 0.00<br>h  | 0.19 ± 0.00<br>i  | 0.13 ± 0.00<br>j    | 0.11 ± 0.00<br>j  | 0.07 ± 0.00<br>j   | 0.07 ± 0.00<br>j   |
|                                | 50        | a                  | 0.76 ± 0.01<br>b | 0.26 ± 0.01<br>c    | 0.17 ± 0.00<br>d   | 0.04 ± 0.00<br>e  | 0.05 ± 0.00<br>e  | 0.05 ± 0.00<br>e    | 0.02 ± 0.00<br>e  | 0.01 ± 0.00<br>e  | 0.01 ± 0.00<br>e    | -                 | -                  | -                  |
|                                |           |                    |                  |                     |                    |                   |                   |                     |                   |                   |                     |                   |                    |                    |
| Total ( <i>Z</i> )-Lutein      | -32       | 0.49 ± 0.01<br>abc | 0.45 ± 0.00<br>d | 0.44 ± 0.01<br>ab   | 0.44 ± 0.00<br>a   | 0.42 ± 0.01<br>d  | 0.41 ± 0.00<br>e  | 0.42 ± 0.00<br>abcf | 0.44 ± 0.01<br>g  | 0.43 ± 0.00<br>cf | 0.43 ± 0.00<br>abcf | 0.44 ± 0.02<br>f  | 0.43 ± 0.00<br>cf  | 0.43 ± 0.00<br>bcf |
|                                | 6         | ab                 | 0.44 ± 0.01<br>c | 0.44 ± 0.00<br>ade  | 0.44 ± 0.00<br>ade | 0.42 ± 0.00<br>c  | 0.42 ± 0.01<br>c  | 0.42 ± 0.00<br>cd   | 0.43 ± 0.00<br>b  | 0.44 ± 0.00<br>a  | 0.42 ± 0.01<br>cd   | 0.44 ± 0.00<br>ae | 0.43 ± 0.00<br>cde | 0.41 ± 0.00<br>c   |
|                                | 20        | a                  | 0.46 ± 0.00<br>a | 0.44 ± 0.00<br>a    | 0.43 ± 0.00<br>a   | 0.40 ± 0.01<br>bc | 0.40 ± 0.00<br>b  | 0.38 ± 0.00<br>d    | 0.37 ± 0.00<br>cd | 0.36 ± 0.00<br>d  | 0.33 ± 0.00<br>e    | 0.32 ± 0.00<br>ef | 0.31 ± 0.01<br>f   | 0.32 ± 0.00<br>ef  |
|                                | 37        | a                  | 0.50 ± 0.00<br>b | 0.39 ± 0.01<br>c    | 0.26 ± 0.01<br>d   | 0.20 ± 0.00<br>e  | 0.16 ± 0.01<br>f  | 0.12 ± 0.00<br>g    | 0.09 ± 0.00<br>h  | 0.06 ± 0.00<br>i  | 0.05 ± 0.01<br>j    | 0.03 ± 0.00<br>jk | 0.03 ± 0.00<br>k   | 0.02 ± 0.01<br>k   |
|                                | 50        | a                  | 0.27 ± 0.01<br>b | 0.12 ± 0.01<br>c    | 0.08 ± 0.00<br>d   | 0.04 ± 0.01<br>e  | 0.03 ± 0.00<br>f  | 0.02 ± 0.01<br>f    | 0.00 ± 0.00<br>e  | 0.00 ± 0.01<br>e  | 0.00 ± 0.00<br>e    | -                 | -                  | -                  |
|                                |           |                    |                  |                     |                    |                   |                   |                     |                   |                   |                     |                   |                    |                    |
| Lutein monolinoleate           | -32       | 0.87 ± 0.00<br>a   | 0.84 ± 0.00<br>a | 0.86 ± 0.01<br>bcde | 0.84 ± 0.00<br>bc  | 0.83 ± 0.00<br>a  | 0.83 ± 0.01<br>b  | 0.87 ± 0.00<br>cde  | 0.89 ± 0.00<br>f  | 0.88 ± 0.01<br>de | 0.85 ± 0.02<br>bcd  | 0.89 ± 0.03<br>e  | 0.85 ± 0.00<br>bc  | 0.85 ± 0.00<br>bc  |
|                                | 6         |                    | 0.86 ± 0.01<br>a | 0.90 ± 0.00<br>bc   | 0.87 ± 0.00<br>b   | 0.83 ± 0.00<br>d  | 0.88 ± 0.01<br>b  | 0.90 ± 0.02<br>bc   | 0.92 ± 0.01<br>e  | 0.92 ± 0.00<br>e  | 0.92 ± 0.01<br>cfg  | 0.93 ± 0.00<br>f  | 0.93 ± 0.00<br>fg  | 0.91 ± 0.00<br>c   |
|                                | 20        |                    | 0.91 ± 0.00<br>b | 0.97 ± 0.01<br>cd   | 0.99 ± 0.00<br>c   | 0.95 ± 0.01<br>d  | 1.00 ± 0.01<br>c  | 1.00 ± 0.01<br>c    | 1.05 ± 0.00<br>e  | 1.05 ± 0.01<br>f  | 1.03 ± 0.01<br>g    | 1.04 ± 0.00<br>fg | 0.98 ± 0.00<br>c   | 0.94 ± 0.00<br>d   |
|                                | 37        |                    | 1.15 ± 0.01<br>b | 1.16 ± 0.01<br>b    | 1.03 ± 0.01<br>c   | 0.92 ± 0.01<br>d  | 0.84 ± 0.01<br>e  | 0.79 ± 0.00<br>a    | 0.70 ± 0.00<br>f  | 0.59 ± 0.02<br>g  | 0.47 ± 0.01<br>h    | 0.41 ± 0.00<br>i  | 0.30 ± 0.00<br>j   | 0.30 ± 0.02<br>j   |
|                                | 50        |                    | 1.04 ± 0.00<br>b | 0.66 ± 0.01<br>c    | 0.41 ± 0.00<br>d   | 0.19 ± 0.00<br>e  | 0.13 ± 0.01<br>e  | 0.09 ± 0.00<br>e    | 0.03 ± 0.01<br>f  | 0.00 ± 0.00<br>g  | 0.00 ± 0.00<br>g    | -                 | -                  | -                  |
|                                |           |                    |                  |                     |                    |                   |                   |                     |                   |                   |                     |                   |                    |                    |
| Lutein 3'- <i>O</i> -linoleate | -32       | 0.15 ± 0.00<br>a   | 0.14 ± 0.00<br>a | 0.15 ± 0.00<br>bc   | 0.15 ± 0.00<br>b   | 0.14 ± 0.00<br>a  | 0.13 ± 0.00<br>a  | 0.15 ± 0.00<br>bc   | 0.16 ± 0.00<br>d  | 0.16 ± 0.00<br>cd | 0.15 ± 0.00<br>b    | 0.16 ± 0.00<br>cd | 0.15 ± 0.00<br>b   | 0.15 ± 0.00<br>b   |
|                                | 6         |                    | 0.14 ± 0.00<br>a | 0.18 ± 0.00<br>b    | 0.18 ± 0.00<br>b   | 0.16 ± 0.00<br>c  | 0.18 ± 0.00<br>b  | 0.20 ± 0.00<br>d    | 0.22 ± 0.00<br>e  | 0.23 ± 0.00<br>f  | 0.22 ± 0.00<br>e    | 0.23 ± 0.00<br>f  | 0.23 ± 0.00<br>f   | 0.25 ± 0.00<br>g   |
|                                | 20        |                    | 0.20 ± 0.00      | 0.24 ± 0.00         | 0.27 ± 0.00        | 0.27 ± 0.00       | 0.31 ± 0.00       | 0.34 ± 0.00         | 0.40 ± 0.00       | 0.40 ± 0.00       | 0.42 ± 0.00         | 0.42 ± 0.00       | 0.41 ± 0.00        | 0.39 ± 0.00        |

|                                |            |             | b           | c           | d           | d           | e           | f           | g           | h           | g           | i           | h           | j           |
|--------------------------------|------------|-------------|-------------|-------------|-------------|-------------|-------------|-------------|-------------|-------------|-------------|-------------|-------------|-------------|
|                                | <b>37</b>  |             | 0.42 ± 0.00 | 0.49 ± 0.00 | 0.47 ± 0.00 | 0.43 ± 0.00 | 0.42 ± 0.01 | 0.42 ± 0.00 | 0.39 ± 0.00 | 0.33 ± 0.01 | 0.27 ± 0.00 | 0.24 ± 0.00 | 0.19 ± 0.00 | 0.19 ± 0.00 |
|                                |            |             | b           | c           | d           | b           | b           | b           | e           | f           | g           | h           | i           | i           |
|                                | <b>50</b>  |             | 0.47 ± 0.00 | 0.34 ± 0.00 | 0.20 ± 0.00 | 0.10 ± 0.00 | 0.07 ± 0.00 | 0.06 ± 0.00 | 0.02 ± 0.00 | 0.00 ± 0.00 | 0.00 ± 0.00 | -           | -           |             |
|                                |            |             | b           | c           | d           | e           | f           | f           | g           | h           | h           |             |             |             |
| Lutein 3- <i>O</i> -linoleate  | <b>-32</b> | 0.72 ± 0.01 | 0.70 ± 0.01 | 0.71 ± 0.00 | 0.69 ± 0.01 | 0.69 ± 0.01 | 0.70 ± 0.01 | 0.72 ± 0.01 | 0.73 ± 0.00 | 0.73 ± 0.01 | 0.70 ± 0.00 | 0.73 ± 0.00 | 0.69 ± 0.00 | 0.70 ± 0.00 |
|                                |            | a           | a           | bcd         | b           | a           | b           | bcd         | e           | cd          | bc          | d           | b           | bc          |
|                                | <b>6</b>   | ab          | 0.72 ± 0.00 | 0.72 ± 0.00 | 0.70 ± 0.01 | 0.67 ± 0.00 | 0.70 ± 0.00 | 0.70 ± 0.00 | 0.70 ± 0.00 | 0.69 ± 0.00 | 0.70 ± 0.00 | 0.70 ± 0.00 | 0.70 ± 0.00 | 0.65 ± 0.00 |
|                                |            |             | a           | c           | d           | b           | d           | d           | e           | e           | d           | cd          | d           | ab          |
|                                | <b>20</b>  | ab          | 0.71 ± 0.01 | 0.72 ± 0.01 | 0.72 ± 0.00 | 0.68 ± 0.00 | 0.68 ± 0.00 | 0.66 ± 0.01 | 0.66 ± 0.00 | 0.65 ± 0.00 | 0.61 ± 0.01 | 0.61 ± 0.00 | 0.58 ± 0.00 | 0.55 ± 0.00 |
|                                |            |             | c           | c           | c           | d           | d           | a           | c           | bd          | e           | e           | f           | g           |
|                                | <b>37</b>  | a           | 0.74 ± 0.00 | 0.67 ± 0.00 | 0.56 ± 0.00 | 0.49 ± 0.00 | 0.41 ± 0.02 | 0.37 ± 0.00 | 0.31 ± 0.00 | 0.25 ± 0.00 | 0.19 ± 0.00 | 0.17 ± 0.00 | 0.12 ± 0.00 | 0.12 ± 0.00 |
|                                |            |             | b           | a           | c           | d           | e           | f           | g           | h           | i           | j           | k           | k           |
|                                | <b>50</b>  | a           | 0.57 ± 0.00 | 0.32 ± 0.00 | 0.22 ± 0.00 | 0.09 ± 0.00 | 0.06 ± 0.00 | 0.04 ± 0.00 | 0.01 ± 0.00 | 0.00 ± 0.00 | 0.00 ± 0.00 | -           | -           | -           |
|                                |            |             | b           | c           | d           | e           | e           | e           | f           | f           | f           |             |             |             |
| Lutein monopalmitate           | <b>-32</b> | 1.50 ± 0.01 | 1.46 ± 0.01 | 1.49 ± 0.01 | 1.46 ± 0.00 | 1.44 ± 0.00 | 1.44 ± 0.02 | 1.50 ± 0.00 | 1.50 ± 0.01 | 1.52 ± 0.01 | 1.47 ± 0.03 | 1.50 ± 0.05 | 1.45 ± 0.00 | 1.44 ± 0.00 |
|                                |            | ab          | a           | cd          | ef          | a           | bg          | cde         | h           | cd          | cef         | d           | efg         | fg          |
|                                | <b>6</b>   | ab          | 1.45 ± 0.03 | 1.49 ± 0.00 | 1.42 ± 0.00 | 1.36 ± 0.01 | 1.39 ± 0.02 | 1.40 ± 0.03 | 1.45 ± 0.02 | 1.43 ± 0.00 | 1.42 ± 0.01 | 1.42 ± 0.00 | 1.38 ± 0.00 | 1.30 ± 0.00 |
|                                |            |             | a           | c           | d           | a           | be          | bde         | c           | c           | de          | de          | be          | f           |
|                                | <b>20</b>  | a           | 1.45 ± 0.00 | 1.45 ± 0.01 | 1.39 ± 0.00 | 1.27 ± 0.02 | 1.25 ± 0.01 | 1.18 ± 0.01 | 1.24 ± 0.01 | 1.18 ± 0.01 | 1.09 ± 0.00 | 1.06 ± 0.00 | 1.03 ± 0.01 | 0.99 ± 0.00 |
|                                |            |             | b           | b           | a           | cd          | ce          | f           | e           | df          | g           | g           | h           | i           |
|                                | <b>37</b>  | a           | 1.40 ± 0.01 | 1.26 ± 0.01 | 0.99 ± 0.02 | 0.80 ± 0.01 | 0.71 ± 0.01 | 0.66 ± 0.01 | 0.57 ± 0.01 | 0.46 ± 0.03 | 0.36 ± 0.01 | 0.29 ± 0.00 | 0.22 ± 0.01 | 0.21 ± 0.02 |
|                                |            |             | a           | b           | c           | d           | e           | f           | g           | h           | i           | j           | k           | k           |
|                                | <b>50</b>  | a           | 1.10 ± 0.01 | 0.60 ± 0.02 | 0.39 ± 0.01 | 0.16 ± 0.00 | 0.10 ± 0.01 | 0.08 ± 0.00 | 0.02 ± 0.01 | 0.00 ± 0.00 | 0.00 ± 0.01 | -           | -           | -           |
|                                |            |             | b           | c           | d           | e           | e           | e           | f           | f           | f           |             |             |             |
| Lutein 3'- <i>O</i> -palmitate | <b>-32</b> | 0.49 ± 0.01 | 0.47 ± 0.01 | 0.49 ± 0.00 | 0.49 ± 0.01 | 0.46 ± 0.01 | 0.48 ± 0.01 | 0.50 ± 0.00 | 0.49 ± 0.00 | 0.51 ± 0.00 | 0.50 ± 0.00 | 0.52 ± 0.00 | 0.49 ± 0.00 | 0.48 ± 0.00 |
|                                |            | a           | a           | bc          | bde         | a           | a           | bd          | f           | bc          | bde         | c           | de          | e           |
|                                | <b>6</b>   |             | 0.48 ± 0.00 | 0.50 ± 0.00 | 0.48 ± 0.01 | 0.47 ± 0.00 | 0.47 ± 0.00 | 0.50 ± 0.00 | 0.51 ± 0.00 | 0.51 ± 0.00 | 0.52 ± 0.00 | 0.52 ± 0.00 | 0.51 ± 0.00 | 0.47 ± 0.00 |
|                                |            |             | a           | b           | c           | a           | d           | c           | e           | e           | b           | b           | bc          | d           |
|                                | <b>20</b>  |             | 0.51 ± 0.01 | 0.54 ± 0.00 | 0.53 ± 0.00 | 0.50 ± 0.00 | 0.50 ± 0.00 | 0.50 ± 0.01 | 0.52 ± 0.00 | 0.52 ± 0.00 | 0.52 ± 0.01 | 0.51 ± 0.00 | 0.51 ± 0.00 | 0.50 ± 0.00 |
|                                |            |             | b           | c           | c           | d           | b           | b           | e           | c           | b           | b           | d           | a           |
|                                | <b>37</b>  |             | 0.61 ± 0.00 | 0.61 ± 0.00 | 0.52 ± 0.00 | 0.43 ± 0.00 | 0.40 ± 0.01 | 0.39 ± 0.00 | 0.35 ± 0.00 | 0.29 ± 0.00 | 0.23 ± 0.00 | 0.19 ± 0.00 | 0.15 ± 0.00 | 0.14 ± 0.00 |
|                                |            |             | b           | b           | c           | d           | e           | e           | f           | g           | h           | i           | j           | j           |
|                                | <b>50</b>  |             | 0.57 ± 0.00 | 0.35 ± 0.00 | 0.22 ± 0.00 | 0.09 ± 0.00 | 0.06 ± 0.00 | 0.04 ± 0.00 | 0.01 ± 0.00 | 0.00 ± 0.00 | 0.00 ± 0.00 | -           | -           | -           |
|                                |            |             | b           | c           | d           | e           | e           | e           | f           | f           | f           |             |             |             |
| Lutein 3- <i>O</i> -palmitate  | <b>-32</b> | 1.01 ± 0.02 | 0.99 ± 0.01 | 1.00 ± 0.01 | 0.96 ± 0.01 | 0.97 ± 0.01 | 0.96 ± 0.02 | 1.00 ± 0.01 | 1.01 ± 0.00 | 1.01 ± 0.01 | 0.98 ± 0.00 | 0.98 ± 0.00 | 0.96 ± 0.01 | 0.96 ± 0.00 |
|                                |            | a           | a           | bc          | de          | a           | d           | bce         | f           | bc          | bde         | c           | d           | d           |
|                                | <b>6</b>   | abc         | 0.97 ± 0.01 | 0.99 ± 0.00 | 0.94 ± 0.01 | 0.89 ± 0.00 | 0.92 ± 0.01 | 0.90 ± 0.00 | 0.94 ± 0.00 | 0.93 ± 0.00 | 0.90 ± 0.01 | 0.90 ± 0.00 | 0.87 ± 0.00 | 0.83 ± 0.00 |
|                                |            |             | ad          | e           | cf          | ad          | bc          | ab          | eg          | fg          | ab          | ab          | d           | h           |
|                                | <b>20</b>  | a           | 0.94 ± 0.01 | 0.92 ± 0.00 | 0.85 ± 0.00 | 0.77 ± 0.01 | 0.75 ± 0.01 | 0.68 ± 0.01 | 0.72 ± 0.00 | 0.66 ± 0.01 | 0.57 ± 0.01 | 0.55 ± 0.00 | 0.52 ± 0.00 | 0.49 ± 0.00 |
|                                |            |             | a           | a           | b           | c           | c           | d           | e           | d           | f           | f           | g           | h           |
|                                | <b>37</b>  | a           | 0.79 ± 0.00 | 0.65 ± 0.00 | 0.47 ± 0.00 | 0.37 ± 0.00 | 0.30 ± 0.01 | 0.26 ± 0.00 | 0.21 ± 0.00 | 0.17 ± 0.00 | 0.13 ± 0.00 | 0.10 ± 0.00 | 0.08 ± 0.00 | 0.07 ± 0.00 |
|                                |            |             | b           | c           | d           | e           | f           | g           | h           | i           | j           | k           | l           | l           |

|                                                                                                                 |     |             |             |             |             |             |             |             |             |             |             |             |             |             |
|-----------------------------------------------------------------------------------------------------------------|-----|-------------|-------------|-------------|-------------|-------------|-------------|-------------|-------------|-------------|-------------|-------------|-------------|-------------|
| (all- <i>E</i> )-β-Carotene                                                                                     | 50  |             | 0.52 ± 0.00 | 0.25 ± 0.00 | 0.18 ± 0.00 | 0.07 ± 0.00 | 0.04 ± 0.00 | 0.04 ± 0.00 | 0.01 ± 0.00 | 0.00 ± 0.00 | 0.00 ± 0.00 | -           | -           | -           |
|                                                                                                                 |     | a           | b           | c           | d           | e           | e           | e           | f           | f           | f           |             |             |             |
|                                                                                                                 | -32 | 0.06 ± 0.00 | 0.06 ± 0.00 | 0.06 ± 0.00 | 0.06 ± 0.00 | 0.07 ± 0.00 | 0.07 ± 0.00 | 0.07 ± 0.00 | 0.07 ± 0.00 | 0.06 ± 0.00 | 0.06 ± 0.00 | 0.06 ± 0.00 | 0.06 ± 0.00 | 0.06 ± 0.00 |
|                                                                                                                 |     | a           | a           | bcd         | bcd         | a           | e           | bce         | be          | bcd         | bcd         | bce         | ad          | acd         |
|                                                                                                                 | 6   |             | 0.06 ± 0.00 | 0.06 ± 0.00 | 0.06 ± 0.00 | 0.06 ± 0.00 | 0.06 ± 0.00 | 0.06 ± 0.00 | 0.06 ± 0.00 | 0.06 ± 0.00 | 0.06 ± 0.00 | 0.06 ± 0.00 | 0.06 ± 0.00 | 0.06 ± 0.00 |
|                                                                                                                 |     | ab          | abc         | d           | def         | def         | cef         | ef          | de          | de          | def         | def         | acf         | b           |
| Lutein dilinoleate                                                                                              | 20  |             | 0.06 ± 0.00 | 0.06 ± 0.00 | 0.06 ± 0.00 | 0.05 ± 0.00 | 0.05 ± 0.00 | 0.05 ± 0.00 | 0.05 ± 0.00 | 0.05 ± 0.00 | 0.05 ± 0.00 | 0.05 ± 0.00 | 0.04 ± 0.00 | 0.04 ± 0.00 |
|                                                                                                                 |     | ab          | c           | c           | ac          | bd          | bde         | def         | bd          | bde         | efg         | fg          | gh          | h           |
|                                                                                                                 | 37  |             | 0.06 ± 0.00 | 0.05 ± 0.00 | 0.04 ± 0.00 | 0.04 ± 0.00 | 0.03 ± 0.00 | 0.03 ± 0.00 | 0.03 ± 0.00 | 0.02 ± 0.00 | 0.02 ± 0.00 | 0.02 ± 0.00 | 0.01 ± 0.00 | 0.01 ± 0.00 |
|                                                                                                                 |     | a           | a           | b           | c           | c           | d           | d           | d           | e           | ef          | f           | g           | g           |
|                                                                                                                 | 50  |             | 0.04 ± 0.00 | 0.03 ± 0.00 | 0.02 ± 0.00 | 0.00 ± 0.00 | 0.00 ± 0.00 | 0.00 ± 0.00 | 0.00 ± 0.00 | 0.00 ± 0.00 | 0.00 ± 0.00 | -           | -           | -           |
|                                                                                                                 |     | a           | b           | c           | d           | e           | e           | e           | e           | e           | e           |             |             |             |
| Lutein 3'- <i>O</i> -linoleate-3- <i>O</i> -palmitate and Lutein 3'- <i>O</i> -palmitate-3- <i>O</i> -linoleate | -32 | 0.12 ± 0.00 | 0.11 ± 0.00 | 0.12 ± 0.01 | 0.12 ± 0.00 | 0.10 ± 0.00 | 0.11 ± 0.01 | 0.13 ± 0.01 | 0.14 ± 0.01 | 0.13 ± 0.00 | 0.11 ± 0.01 | 0.12 ± 0.00 | 0.11 ± 0.00 | 0.10 ± 0.01 |
|                                                                                                                 |     | abcde       | abc         | de          | ade         | bc          | abcd        | e           | f           | e           | abcd        | abde        | abc         | c           |
|                                                                                                                 | 6   |             | 0.12 ± 0.01 | 0.14 ± 0.00 | 0.15 ± 0.01 | 0.14 ± 0.00 | 0.18 ± 0.00 | 0.19 ± 0.00 | 0.23 ± 0.00 | 0.23 ± 0.01 | 0.22 ± 0.00 | 0.22 ± 0.00 | 0.22 ± 0.00 | 0.24 ± 0.00 |
|                                                                                                                 |     |             | a           | b           | b           | b           | c           | c           | de          | d           | d           | d           | d           | e           |
|                                                                                                                 | 20  |             | 0.16 ± 0.00 | 0.20 ± 0.01 | 0.26 ± 0.01 | 0.28 ± 0.01 | 0.35 ± 0.01 | 0.39 ± 0.01 | 0.51 ± 0.00 | 0.50 ± 0.01 | 0.53 ± 0.01 | 0.55 ± 0.00 | 0.50 ± 0.00 | 0.53 ± 0.01 |
|                                                                                                                 |     |             | b           | c           | d           | d           | e           | f           | gh          | g           | h           | i           | g           | h           |
| Lutein dipalmitate                                                                                              | 37  |             | 0.42 ± 0.01 | 0.55 ± 0.01 | 0.67 ± 0.00 | 0.74 ± 0.02 | 0.79 ± 0.02 | 0.96 ± 0.01 | 1.02 ± 0.01 | 0.93 ± 0.02 | 0.82 ± 0.01 | 0.82 ± 0.01 | 0.67 ± 0.00 | 0.69 ± 0.01 |
|                                                                                                                 |     |             | b           | c           | d           | e           | f           | g           | h           | i           | f           | j           | d           | d           |
|                                                                                                                 | 50  |             | 0.69 ± 0.03 | 0.76 ± 0.01 | 0.54 ± 0.01 | 0.37 ± 0.00 | 0.30 ± 0.00 | 0.23 ± 0.01 | 0.12 ± 0.00 | 0.07 ± 0.00 | 0.04 ± 0.00 | -           | -           | -           |
|                                                                                                                 |     |             | b           | c           | d           | e           | ef          | f           | a           | g           | g           |             |             |             |
|                                                                                                                 | -32 | 0.42 ± 0.01 | 0.38 ± 0.01 | 0.41 ± 0.00 | 0.39 ± 0.00 | 0.36 ± 0.00 | 0.38 ± 0.01 | 0.42 ± 0.01 | 0.43 ± 0.00 | 0.42 ± 0.01 | 0.39 ± 0.00 | 0.43 ± 0.01 | 0.38 ± 0.01 | 0.37 ± 0.01 |
|                                                                                                                 |     | abcd        | abcd        | cef         | abcde       | a           | ab          | bcdef       | ef          | f           | abcd        | cdef        | abd         | ab          |
| Lutein dipalmitate                                                                                              | 6   |             | 0.38 ± 0.01 | 0.45 ± 0.01 | 0.42 ± 0.00 | 0.42 ± 0.00 | 0.48 ± 0.01 | 0.48 ± 0.00 | 0.54 ± 0.00 | 0.54 ± 0.01 | 0.51 ± 0.00 | 0.51 ± 0.00 | 0.49 ± 0.00 | 0.47 ± 0.01 |
|                                                                                                                 |     | a           | a           | b           | b           | b           | c           | cd          | e           | e           | fg          | ef          | dfg         | cdg         |
|                                                                                                                 | 20  |             | 0.47 ± 0.01 | 0.51 ± 0.00 | 0.55 ± 0.00 | 0.54 ± 0.00 | 0.63 ± 0.01 | 0.63 ± 0.00 | 0.76 ± 0.01 | 0.75 ± 0.02 | 0.72 ± 0.01 | 0.73 ± 0.01 | 0.67 ± 0.00 | 0.69 ± 0.01 |
|                                                                                                                 |     | a           | b           | c           | d           | d           | e           | e           | fg          | f           | fh          | g           | i           | hi          |
|                                                                                                                 | 37  |             | 0.73 ± 0.01 | 0.84 ± 0.01 | 0.90 ± 0.01 | 0.93 ± 0.03 | 0.97 ± 0.03 | 1.08 ± 0.01 | 1.10 ± 0.02 | 1.00 ± 0.02 | 0.86 ± 0.00 | 0.81 ± 0.01 | 0.68 ± 0.00 | 0.69 ± 0.01 |
|                                                                                                                 |     | a           | b           | c           | d           | de          | f           | g           | h           | i           | ef          | ef          | c           | c           |
| Lutein dipalmitate                                                                                              | 50  |             | 1.06 ± 0.01 | 0.97 ± 0.01 | 0.72 ± 0.00 | 0.42 ± 0.00 | 0.34 ± 0.00 | 0.26 ± 0.01 | 0.14 ± 0.00 | 0.08 ± 0.00 | 0.04 ± 0.00 | -           | -           | -           |
|                                                                                                                 |     | a           | b           | c           | d           | e           | e           | e           | f           | g           | g           |             |             |             |
|                                                                                                                 | -32 | 0.41 ± 0.01 | 0.36 ± 0.00 | 0.39 ± 0.00 | 0.37 ± 0.01 | 0.34 ± 0.01 | 0.36 ± 0.01 | 0.39 ± 0.01 | 0.43 ± 0.01 | 0.40 ± 0.01 | 0.39 ± 0.00 | 0.40 ± 0.01 | 0.36 ± 0.00 | 0.34 ± 0.00 |
|                                                                                                                 |     | abc         | ad          | bc          | ab          | ad          | ad          | bc          | e           | c           | bc          | c           | ad          | d           |
|                                                                                                                 | 6   |             | 0.34 ± 0.00 | 0.39 ± 0.00 | 0.37 ± 0.00 | 0.34 ± 0.00 | 0.39 ± 0.01 | 0.39 ± 0.00 | 0.43 ± 0.01 | 0.41 ± 0.01 | 0.40 ± 0.01 | 0.39 ± 0.01 | 0.36 ± 0.00 | 0.31 ± 0.00 |
|                                                                                                                 |     | a           | b           | ac          | a           | b           | acd         | acd         | e           | ef          | df          | cdf         | a           | b           |
| Lutein dipalmitate                                                                                              | 20  |             | 0.38 ± 0.01 | 0.39 ± 0.00 | 0.39 ± 0.00 | 0.35 ± 0.00 | 0.39 ± 0.01 | 0.36 ± 0.01 | 0.42 ± 0.01 | 0.39 ± 0.01 | 0.37 ± 0.00 | 0.36 ± 0.00 | 0.32 ± 0.01 | 0.32 ± 0.01 |
|                                                                                                                 |     | a           | ab          | abc         | bc          | a           | cd          | abc         | e           | de          | d           | d           | ab          | ab          |
|                                                                                                                 | 37  |             | 0.44 ± 0.01 | 0.44 ± 0.00 | 0.41 ± 0.01 | 0.37 ± 0.01 | 0.37 ± 0.02 | 0.39 ± 0.01 | 0.37 ± 0.01 | 0.33 ± 0.01 | 0.28 ± 0.00 | 0.25 ± 0.00 | 0.21 ± 0.00 | 0.19 ± 0.00 |
|                                                                                                                 |     | a           | bc          | bd          | bd          | bc          | bc          | d           | d           | bd          | c           | e           | f           | f           |
|                                                                                                                 | 50  |             | 0.51 ± 0.00 | 0.39 ± 0.01 | 0.30 ± 0.00 | 0.16 ± 0.00 | 0.12 ± 0.00 | 0.08 ± 0.00 | 0.04 ± 0.00 | 0.03 ± 0.00 | 0.01 ± 0.00 | -           | -           | -           |
|                                                                                                                 |     | a           |             |             |             |             |             |             |             |             |             |             |             |             |

|                                                                  |     |      | b    | c    | d    | e    | e    | e    | f    | g    | fg   |      |      |      |
|------------------------------------------------------------------|-----|------|------|------|------|------|------|------|------|------|------|------|------|------|
| Monoesters and Regioisomers ratios                               |     |      |      |      |      |      |      |      |      |      |      |      |      |      |
| Lutein monopalmitate/<br>Lutein monolinoleate                    | -32 | 1.72 | 1.74 | 1.73 | 1.73 | 1.74 | 1.73 | 1.72 | 1.68 | 1.72 | 1.73 | 1.69 | 1.71 | 1.69 |
|                                                                  | 6   |      | 1.69 | 1.66 | 1.62 | 1.62 | 1.58 | 1.56 | 1.58 | 1.56 | 1.54 | 1.52 | 1.48 | 1.44 |
|                                                                  | 20  |      | 1.58 | 1.50 | 1.40 | 1.34 | 1.26 | 1.19 | 1.17 | 1.13 | 1.06 | 1.02 | 1.05 | 1.05 |
|                                                                  | 37  |      | 1.21 | 1.08 | 0.96 | 0.88 | 0.84 | 0.83 | 0.81 | 0.79 | 0.77 | 0.72 | 0.74 | 0.69 |
|                                                                  | 50  |      | 1.05 | 0.91 | 0.95 | 0.85 | 0.74 | 0.89 | 0.60 | -    | -    | -    | -    | -    |
| Lutein 3- <i>O</i> -linoleate<br>/Lutein 3'- <i>O</i> -linoleate | -32 | 4.68 | 5.15 | 4.59 | 4.58 | 5.01 | 5.20 | 4.70 | 4.44 | 4.57 | 4.68 | 4.58 | 4.58 | 4.69 |
|                                                                  | 6   |      | 5.03 | 4.11 | 3.96 | 4.11 | 3.91 | 3.49 | 3.24 | 3.07 | 3.22 | 3.05 | 3.01 | 2.59 |
|                                                                  | 20  |      | 3.56 | 2.97 | 2.63 | 2.52 | 2.19 | 1.93 | 1.65 | 1.63 | 1.45 | 1.44 | 1.43 | 1.43 |
|                                                                  | 37  |      | 1.77 | 1.39 | 1.20 | 1.15 | 0.98 | 0.90 | 0.82 | 0.76 | 0.70 | 0.70 | 0.64 | 0.64 |
|                                                                  | 50  |      | 1.20 | 0.92 | 1.12 | 0.86 | 0.77 | 0.68 | 0.47 | -    | -    | -    | -    | -    |
| Lutein 3- <i>O</i> -palmitate<br>/Lutein 3'- <i>O</i> -palmitate | -32 | 2.05 | 2.11 | 2.04 | 1.96 | 2.11 | 2.01 | 2.00 | 2.04 | 1.99 | 1.98 | 1.89 | 1.97 | 2.00 |
|                                                                  | 6   |      | 2.01 | 1.99 | 1.95 | 1.90 | 1.96 | 1.82 | 1.83 | 1.82 | 1.74 | 1.72 | 1.70 | 1.78 |
|                                                                  | 20  |      | 1.83 | 1.70 | 1.60 | 1.52 | 1.48 | 1.34 | 1.39 | 1.27 | 1.11 | 1.08 | 1.02 | 0.97 |
|                                                                  | 37  |      | 1.30 | 1.07 | 0.92 | 0.87 | 0.75 | 0.66 | 0.61 | 0.59 | 0.55 | 0.53 | 0.52 | 0.51 |
|                                                                  | 50  |      | 0.92 | 0.72 | 0.81 | 0.78 | 0.74 | 0.99 | 0.61 | -    | -    | -    | -    | -    |

<sup>1</sup>Data are the mean  $\pm$  standard error (n=5 for the starting sample, n=3 for the rest of the samples). Different letters within the same line (for each pigment) indicate significant differences (p<0.05) determined by the Duncan test.
